# Supplementary material for: Effectiveness of Telehealth in Rural and Remote Emergency Departments: Systematic Review
Source: PubMed Central journal article supplement (PMC8665379; doi:10.2196/30632), 2021-11-26
Supplement: jmir_v23i11e30632_app2.pdf [file jmir_v23i11e30632_app2.pdf]

**Table S1 Study categories: clinical area by country of telehealth implementation**

| Clinical Area       | Australia | Finland  | Germany  | Norway   | Poland   | UK       | USA       | Total     |
|---------------------|-----------|----------|----------|----------|----------|----------|-----------|-----------|
| Burns               |           |          |          |          |          |          | 1         | 1         |
| Cardio-vascular     |           |          |          |          | 1        |          |           | 1         |
| Mental Health       |           |          |          |          |          |          | 2         | 2         |
| Minor Injury        |           |          |          |          |          | 1        |           | 1         |
| Ophthalmology       |           |          |          |          |          | 1        |           | 1         |
| Paediatrics         |           |          |          |          |          |          | 2         | 2         |
| Rural and Remote ED | 1         |          |          |          |          |          | 3         | 3         |
| Stroke              | 1         | 1        | 1        |          |          |          | 3         | 6         |
| Trauma              |           |          |          | 1        |          |          | 2         | 3         |
| <b>Total</b>        | <b>2</b>  | <b>1</b> | <b>1</b> | <b>1</b> | <b>1</b> | <b>2</b> | <b>13</b> | <b>21</b> |

**Table S2 Study categories: clinical area by operational use of telehealth**

| Clinical Area                | Diagnostics | Direct consultation | Specialist support | Specialty Total |
|------------------------------|-------------|---------------------|--------------------|-----------------|
| Burns                        |             |                     | 1                  | 1               |
| Cardiovascular               | 1           |                     |                    | 1               |
| Mental Health                |             | 1                   | 1                  | 2               |
| Minor Injury                 |             | 1                   |                    | 1               |
| Ophthalmology                |             |                     | 1                  | 1               |
| Paediatrics                  |             |                     | 2                  | 2               |
| Rural and Remote ED          |             | 2                   | 2                  | 4               |
| Stroke                       |             | 1                   | 5                  | 6               |
| Trauma                       |             | 3                   |                    | 3               |
| <b>Operational Use Total</b> | <b>1</b>    | <b>8</b>            | <b>12</b>          | <b>21</b>       |

**Table S3 Study design by comparison categories of included studies**

| Comparison Type                    | Experimental                                                                                                  | Cohort studies                                                                                                                                                             | Qualitative         | Comparison Subtotal |
|------------------------------------|---------------------------------------------------------------------------------------------------------------|----------------------------------------------------------------------------------------------------------------------------------------------------------------------------|---------------------|---------------------|
| Before and after                   |                                                                                                               | Duchesne et al (2008)<br>Mohr, Young et al (2018)<br>Saffle et al (2009)<br>Southard et al (2017)<br>Sterling et al (2017)<br>Westbrook et al (2008)                       | Muller et al (2014) | 7                   |
| Cross section comparison           | <b>Non-randomised</b><br>Bowman et al (2003)<br><b>Randomised</b><br>Benger et al (2004)<br>Myer et al (2008) | Barlinn et al (2017)<br>Dharmar et al (2013)<br>Harvey et al (2017)<br>Mohr, Vakkalanka et al (2018)<br>Vakkalanka et al (2019)<br>Wang et al (2000)<br>Yaghi et al (2015) | Bolle et al (2009)  | 11                  |
| Early v mature telemedicine phases |                                                                                                               | Kleinrok et al (2014)<br>Bladin et al (2020)                                                                                                                               |                     | 2                   |
| Telemedicine and population        |                                                                                                               | Sairanen et al (2011)                                                                                                                                                      |                     | 1                   |
| <b>Study Design Subtotal</b>       | <b>3</b>                                                                                                      | <b>16</b>                                                                                                                                                                  | <b>2</b>            | <b>21</b>           |
